# Supplementary material for: The Association of the Polymorphisms in the FUT8-Related Locus with the Plasma Glycosylation in Post-Traumatic Stress Disorder
Source: MDPI journal article supplement (doi:10.3390/ijms24065706), 2023-03-16
Supplement: s1 [file s1]

**Supplementary Table S1.** The plasma N-glycan peaks separated by HILIC and their dominant composition

| Glycan peak | Major glycan structure | Description                                                             |
|-------------|------------------------|-------------------------------------------------------------------------|
| GP01        | FA2                    | agalactosylated                                                         |
| GP02        | M5, FA2B               | high mannose (M5), agalactosylated with bisecting GlcNAc (FA2B)         |
| GP03        | A2[6]BG1               | monogalactosylated with bisecting GlcNAc                                |
| GP04        | FA2[6]G1               | monogalactosylated with core fucose                                     |
| GP05        | FA2[3]G1               | monogalactosylated with core fucose                                     |
| GP06        | FA2[6]BG1              | monogalactosylated with core fucose and bisecting GlcNAc                |
| GP07        | M6                     | high mannose                                                            |
| GP08        | A2G2                   | digalactosylated                                                        |
| GP09        | A2BG2                  | digalactosylated with bisecting GlcNAc                                  |
| GP10        | FA2G2                  | digalactosylated with core fucose                                       |
| GP11        | FA2BG2                 | digalactosylated with core fucose and bisecting GlcNAc                  |
| GP12        | A2[3]BG1S(3)1          | monogalactosylated with bisecting GlcNAc                                |
| GP13        | FA2[3]G1S(3)1          | monogalactosylated and sialylated with core fucose                      |
| GP14        | A2G2S(6)1              | digalactosylated and sialylated                                         |
| GP15        | A2BG2S1                | digalactosylated and sialylated with bisecting GlcNAc                   |
| GP16        | FA2G2S(6)1             | digalactosylated and sialylated with core fucose                        |
| GP17        | FA2BG2S(3)1            | digalactosylated and sialylated with bisecting GlcNAc and core fucose   |
| GP18        | A2G2S(3,6)2            | digalactosylated and disialylated                                       |
| GP19        | M9                     | high mannose                                                            |
| GP20        | A2G2S(3,6)2            | digalactosylated and disialylated                                       |
| GP21        | A2BG2S2                | digalactosylated and disialylated with bisecting GlcNAc                 |
| GP22        | FA2G2S(3,6)2           | digalactosylated and disialylated with core fucose                      |
| GP23        | FA2BG2S(3,6)2          | digalactosylated and disialylated with bisecting GlcNAc and core fucose |
| GP24        | A3G3S(3,6)2            | trigalactosylated and disialylated                                      |
| GP25        | A3BG3S2                | trigalactosylated and disialylated with bisecting GlcNAc                |
| GP26        | A3G3S(3,3)2            | trigalactosylated and disialylated                                      |
| GP27        | A3G3S(3,3,3)3          | trigalactosylated and trisialylated                                     |
| GP28        | A3G3S(3,3,6)3          | trigalactosylated and trisialylated                                     |
| GP29        | FA3G3S(3,3,3)3         | trigalactosylated and trisialylated with core fucose                    |
| GP30        | A3G3S(3,3,6)3          | trigalactosylated and trisialylated                                     |
| GP31        | FA3G3S(3,3,6)3         | trigalactosylated and trisialylated with core fucose                    |
| GP32        | A3F1G3S(3,3,3)3        | trigalactosylated and trisialylated with antennary fucose               |
| GP33        | A4G4S(3,3,3)3          | tetragalactosylated and trisialylated                                   |
| GP34        | A4G4S(3,3,6)3          | tetragalactosylated and trisialylated                                   |
| GP35        | A4F1G3S(3,3,3)3        | tetragalactosylated and trisialylated with antennary fucose             |
| GP36        | A4G4S(3,3,3,3)4        | tetragalactosylated and tetrasialylated                                 |
| GP37        | A4G4S(3,3,3,6)4        | tetragalactosylated and tetrasialylated                                 |
| GP38        | A4G4S(3,6,6,6)4        | tetragalactosylated and tetrasialylated                                 |
| GP39        | A4F1G4S(3,3,3,6)4      | tetragalactosylated and tetrasialylated with antennary fucose           |

Structure abbreviations: all N-glycans have two core N-acetylglucosamines (GlcNAcs); F at the start of the abbreviation indicates core fucose  $\alpha$ 1-6 linked to the inner GlcNAc; Mx, number (x) of mannose on the core GlcNAcs; Ax, number of antennae (GlcNAc) on the trimannosyl core; B, bisecting GlcNAc linked  $\beta$ 1-4 to  $\beta$ 1-3 mannose; Gx, number (x) of  $\beta$ 1-4 linked galactose on the antenna; [3]G1 and [6]G1 indicates that the galactose is present on the antenna of the  $\alpha$ 1-3 or  $\alpha$ 1-6 mannose; F(x), number (x) of fucose linked  $\alpha$ 1-3 to the antenna GlcNAc; Sx, number (x) of sialic acids linked to galactose; the numbers 3 or 6 or in parentheses after S indicate whether the sialic acid is in a  $\alpha$ 2-3 or  $\alpha$ 2-6 linkage. If there is no linkage number, the exact link is unknown.

**Supplementary Table S2.** The list of the N-glycan peaks with their p-values ( $p_{BH}$ ) obtained by the univariate analysis (corrected with the Benjamini-Hochberg procedure), the correlation coefficients values ( $p(corr)$ ), and variable importance in the projection (VIP) obtained by the Supervised Orthogonal Partial Least Square – Discriminant Analysis (OPLS-DA).

| Glycan peak | $p_{BH}$         | $p(corr)$     | VIP          |
|-------------|------------------|---------------|--------------|
| GP01        | 0.857            | -0.084        | 0.396        |
| GP02        | 0.962            | 0.092         | 0.757        |
| GP03        | 0.526            | 0.253         | 0.773        |
| GP04        | <b>0.039</b>     | <b>-0.449</b> | <b>1.207</b> |
| GP05        | <b>0.010</b>     | <b>-0.527</b> | <b>1.348</b> |
| GP06        | 0.459            | -0.116        | 0.869        |
| GP07        | 0.009            | -0.071        | 0.750        |
| GP08        | 0.011            | 0.330         | 0.799        |
| GP09        | 0.839            | 0.133         | 0.885        |
| GP10        | <b>0.016</b>     | <b>-0.461</b> | <b>1.215</b> |
| GP11        | 0.078            | -0.055        | 0.921        |
| GP12        | 0.700            | -0.040        | 0.437        |
| GP13        | 0.117            | -0.354        | 1.040        |
| GP14        | 0.002            | 0.375         | 0.937        |
| GP15        | 0.649            | 0.131         | 0.769        |
| GP16        | <b>0.008</b>     | <b>-0.424</b> | <b>1.306</b> |
| GP17        | 0.249            | 0.022         | 0.819        |
| GP18        | 0.343            | -0.262        | 0.681        |
| GP19        | <b>0.002</b>     | <b>-0.455</b> | <b>1.102</b> |
| GP20        | 0.924            | 0.063         | 0.776        |
| GP21        | 0.903            | 0.195         | 0.488        |
| GP22        | 0.039            | -0.349        | 0.839        |
| GP23        | 0.577            | -0.023        | 0.678        |
| GP24        | 0.335            | -0.126        | 0.486        |
| GP25        | 0.963            | 0.050         | 0.524        |
| GP26        | 0.687            | 0.015         | 0.534        |
| GP27        | <b>0.001</b>     | <b>0.700</b>  | <b>1.715</b> |
| GP28        | 0.588            | -0.311        | 0.868        |
| GP29        | 0.140            | -0.227        | 0.726        |
| GP30        | 0.919            | -0.183        | 0.722        |
| GP31        | 0.095            | -0.386        | 1.089        |
| GP32        | <b>0.050</b>     | <b>0.377</b>  | <b>1.112</b> |
| GP33        | <b>0.001</b>     | <b>0.688</b>  | <b>1.699</b> |
| GP34        | 0.259            | 0.092         | 0.852        |
| GP35        | <b>0.015</b>     | <b>0.502</b>  | <b>1.302</b> |
| GP36        | <b>&lt;0.001</b> | <b>0.605</b>  | <b>1.590</b> |
| GP37        | 0.348            | 0.010         | 0.515        |
| GP38        | <b>&lt;0.001</b> | <b>0.437</b>  | <b>1.250</b> |
| GP39        | <b>&lt;0.001</b> | <b>0.693</b>  | <b>1.706</b> |

Variables with  $p_{BH} \leq 0.05$ , absolute  $p(corr) \geq 0.30$ , and  $VIP > 1.000$  were considered the significant contributors in discriminating the diagnostic groups and are denoted in bold. Negative  $p(corr)$  indicates diminished glycan concentrations in the plasma of PTSD patients versus control participants, whereas positive  $p(corr)$  values indicate increased glycan concentrations in PTSD patients.

**Supplementary Table S3.** The associations of the rs6573604 and rs11621121 polymorphisms (genetic and allelic model) with the plasma N-glycan levels in the control participants and the patients with PTSD.

| Glycan peak | Group   | rs6573604     |       |                 |               |       |                 | rs11621121    |        |                 |               |        |                 |
|-------------|---------|---------------|-------|-----------------|---------------|-------|-----------------|---------------|--------|-----------------|---------------|--------|-----------------|
|             |         | Genetic model |       |                 | Allelic model |       |                 | Genetic model |        |                 | Allelic model |        |                 |
|             |         | H             | p     | p <sub>BH</sub> | U             | p     | p <sub>BH</sub> | H             | p      | p <sub>BH</sub> | U             | p      | p <sub>BH</sub> |
| GP01        | Control | 1.566         | 0.457 | 0.775           | 20518.5       | 0.786 | 0.876           | 0.930         | 0.628  | 0.742           | 28566.0       | 0.342  | 0.534           |
|             | PTSD    | 0.480         | 0.786 | 0.929           | 23138.5       | 0.615 | 0.923           | 0.836         | 0.658  | 0.778           | 40804.5       | 0.420  | 0.546           |
| GP02        | Control | 1.278         | 0.528 | 0.735           | 20120.5       | 0.565 | 0.787           | 2.315         | 0.314  | 0.510           | 28078.0       | 0.208  | 0.406           |
|             | PTSD    | 1.551         | 0.461 | 0.782           | 23344.5       | 0.712 | 0.926           | 1.871         | 0.392  | 0.637           | 39552.5       | 0.156  | 0.304           |
| GP03        | Control | 5.631         | 0.060 | 0.334           | 18534.5       | 0.074 | 0.241           | 2.640         | 0.267  | 0.548           | 27566.0       | 0.113  | 0.367           |
|             | PTSD    | 3.388         | 0.184 | 0.652           | 21940.5       | 0.199 | 0.776           | 0.156         | 0.925  | 0.925           | 42282.5       | 0.933  | 0.933           |
| GP04        | Control | 1.997         | 0.368 | 0.718           | 20160.5       | 0.586 | 0.737           | 6.027         | 0.049  | 0.478           | 26852.0       | 0.041  | 0.200           |
|             | PTSD    | 1.128         | 0.569 | 0.888           | 22270.5       | 0.285 | 0.695           | 0.751         | 0.687  | 0.788           | 40668.5       | 0.382  | 0.514           |
| GP05        | Control | 1.450         | 0.484 | 0.726           | 20092.5       | 0.551 | 0.796           | 1.109         | 0.574  | 0.700           | 28440.0       | 0.303  | 0.514           |
|             | PTSD    | 3.373         | 0.185 | 0.601           | 22926.5       | 0.521 | 0.813           | 0.343         | 0.842  | 0.888           | 41230.5       | 0.549  | 0.630           |
| GP06        | Control | 2.510         | 0.285 | 0.654           | 18780.5       | 0.110 | 0.268           | 1.629         | 0.443  | 0.596           | 28188.0       | 0.234  | 0.415           |
|             | PTSD    | 2.718         | 0.257 | 0.626           | 21776.5       | 0.164 | 0.711           | 7.353         | 0.025  | 0.139           | 37042.5       | 0.008  | 0.052           |
| GP07        | Control | 0.286         | 0.867 | 0.939           | 20124.5       | 0.567 | 0.763           | 3.157         | 0.206  | 0.502           | 27666.0       | 0.128  | 0.357           |
|             | PTSD    | 3.765         | 0.152 | 0.741           | 23338.5       | 0.709 | 0.953           | 3.153         | 0.207  | 0.449           | 39672.5       | 0.174  | 0.308           |
| GP08        | Control | 0.056         | 0.973 | 0.999           | 20754.5       | 0.928 | 0.978           | 9.067         | 0.011  | 0.215           | 25454.0       | 0.003  | 0.059           |
|             | PTSD    | 3.143         | 0.208 | 0.624           | 21110.5       | 0.068 | 0.332           | 5.332         | 0.070  | 0.248           | 38938.5       | 0.086  | 0.224           |
| GP09        | Control | 2.193         | 0.334 | 0.686           | 20334.5       | 0.681 | 0.781           | 2.468         | 0.291  | 0.516           | 27882.0       | 0.166  | 0.341           |
|             | PTSD    | 4.004         | 0.135 | 1.053           | 23158.5       | 0.624 | 0.901           | 2.856         | 0.240  | 0.468           | 39076.5       | 0.099  | 0.241           |
| GP10        | Control | 1.907         | 0.385 | 0.715           | 19020.5       | 0.157 | 0.360           | 4.097         | 0.129  | 0.503           | 27860.0       | 0.162  | 0.351           |
|             | PTSD    | 0.107         | 0.948 | 0.999           | 23438.5       | 0.758 | 0.924           | 1.449         | 0.484  | 0.699           | 40448.5       | 0.327  | 0.455           |
| GP11        | Control | 1.135         | 0.567 | 0.763           | 19508.5       | 0.297 | 0.610           | 0.923         | 0.630  | 0.723           | 29108.0       | 0.546  | 0.761           |
|             | PTSD    | 3.837         | 0.147 | 0.819           | 22398.5       | 0.325 | 0.704           | 5.560         | 0.062  | 0.242           | 37500.5       | 0.015  | 0.059           |
| GP12        | Control | 1.748         | 0.417 | 0.739           | 19690.5       | 0.366 | 0.714           | 0.088         | 0.957  | 0.957           | 29596.0       | 0.769  | 0.857           |
|             | PTSD    | 0.448         | 0.799 | 0.917           | 23572.5       | 0.826 | 0.920           | 0.338         | 0.845  | 0.867           | 41502.5       | 0.642  | 0.696           |
| GP13        | Control | 0.492         | 0.782 | 0.924           | 19874.5       | 0.446 | 0.696           | 1.488         | 0.475  | 0.598           | 29310.0       | 0.634  | 0.824           |
|             | PTSD    | 0.896         | 0.639 | 0.923           | 22522.5       | 0.366 | 0.751           | 5.167         | 0.076  | 0.228           | 37634.5       | 0.018  | 0.059           |
| GP14        | Control | 0.621         | 0.733 | 0.893           | 19956.5       | 0.484 | 0.726           | 4.610         | 0.100  | 0.650           | 26820.0       | 0.039  | 0.254           |
|             | PTSD    | 5.176         | 0.075 | 0.731           | 20324.5       | 0.019 | 0.185           | 7.801         | 0.020  | 0.195           | 36918.5       | 0.007  | 0.055           |
| GP15        | Control | 0.343         | 0.843 | 0.939           | 20200.5       | 0.607 | 0.717           | 4.482         | 0.106  | 0.517           | 26818.0       | 0.039  | 0.217           |
|             | PTSD    | 2.347         | 0.309 | 0.709           | 22288.5       | 0.291 | 0.668           | 2.447         | 0.294  | 0.521           | 39134.5       | 0.104  | 0.239           |
| GP16        | Control | 2.709         | 0.258 | 0.629           | 18734.5       | 0.102 | 0.265           | 3.169         | 0.205  | 0.533           | 28132.0       | 0.220  | 0.409           |
|             | PTSD    | 0.179         | 0.915 | 0.991           | 23364.5       | 0.722 | 0.908           | 11.512        | 0.003  | <b>0.039</b>    | 35666.5       | 0.001  | <b>0.020</b>    |
| GP17        | Control | 0.123         | 0.941 | 0.992           | 20770.5       | 0.937 | 0.962           | 4.371         | 0.112  | 0.485           | 26798.0       | 0.038  | 0.296           |
|             | PTSD    | 2.053         | 0.358 | 0.698           | 22696.5       | 0.429 | 0.761           | 6.680         | 0.035  | 0.171           | 37424.5       | 0.014  | 0.068           |
| GP18        | Control | 0.445         | 0.801 | 0.919           | 20142.5       | 0.577 | 0.750           | 2.436         | 0.296  | 0.502           | 29370.0       | 0.662  | 0.807           |
|             | PTSD    | 6.913         | 0.032 | 0.416           | 20228.5       | 0.016 | 0.208           | 1.292         | 0.524  | 0.705           | 41508.5       | 0.644  | 0.679           |
| GP19        | Control | 3.829         | 0.147 | 0.478           | 18164.5       | 0.039 | 0.169           | 3.240         | 0.198  | 0.552           | 27456.0       | 0.098  | 0.347           |
|             | PTSD    | 0.409         | 0.815 | 0.908           | 23588.5       | 0.834 | 0.904           | 2.777         | 0.249  | 0.462           | 41054.5       | 0.494  | 0.602           |
| GP20        | Control | 4.085         | 0.130 | 0.563           | 18362.5       | 0.055 | 0.195           | 2.224         | 0.329  | 0.513           | 29748.0       | 0.844  | 0.890           |
|             | PTSD    | 2.816         | 0.245 | 0.683           | 22042.5       | 0.224 | 0.794           | 7.233         | 0.027  | 0.156           | 36544.5       | 0.005  | <b>0.049</b>    |
| GP21        | Control | 8.104         | 0.017 | 0.166           | 20168.5       | 0.590 | 0.719           | 3.696         | 0.158  | 0.474           | 27106.0       | 0.060  | 0.234           |
|             | PTSD    | 1.808         | 0.405 | 0.752           | 22764.5       | 0.455 | 0.772           | 0.470         | 0.791  | 0.857           | 41118.5       | 0.514  | 0.607           |
| GP22        | Control | 1.563         | 0.458 | 0.744           | 19856.5       | 0.437 | 0.710           | 21.000        | <0.001 | <b>0.001</b>    | 23408.0       | <0.001 | <b>0.001</b>    |
|             | PTSD    | 0.054         | 0.974 | 1.000           | 23552.5       | 0.816 | 0.936           | 19.336        | <0.001 | <b>0.002</b>    | 33526.5       | <0.001 | <b>0.001</b>    |
| GP23        | Control | 0.037         | 0.981 | 0.981           | 20638.5       | 0.858 | 0.930           | 5.494         | 0.064  | 0.499           | 30006.0       | 0.974  | 1.000           |
|             | PTSD    | 0.939         | 0.625 | 0.938           | 23606.5       | 0.843 | 0.865           | 12.784        | 0.002  | <b>0.039</b>    | 35466.5       | 0.001  | <b>0.013</b>    |
| GP24        | Control | 2.807         | 0.246 | 0.640           | 18586.5       | 0.081 | 0.243           | 2.726         | 0.256  | 0.587           | 29694.0       | 0.817  | 0.885           |
|             | PTSD    | 1.173         | 0.556 | 0.904           | 22202.5       | 0.266 | 0.741           | 3.312         | 0.191  | 0.466           | 39296.5       | 0.123  | 0.267           |
| GP25        | Control | 2.331         | 0.312 | 0.676           | 18728.5       | 0.101 | 0.281           | 2.031         | 0.362  | 0.523           | 29358.0       | 0.656  | 0.825           |

| Glycan peak | Group   | rs6573604     |        |                 |               |        |                 | rs11621121    |       |                 |               |       |                 |
|-------------|---------|---------------|--------|-----------------|---------------|--------|-----------------|---------------|-------|-----------------|---------------|-------|-----------------|
|             |         | Genetic model |        |                 | Allelic model |        |                 | Genetic model |       |                 | Allelic model |       |                 |
|             |         | H             | p      | p <sub>BH</sub> | U             | p      | p <sub>BH</sub> | H             | p     | p <sub>BH</sub> | U             | p     | p <sub>BH</sub> |
|             | PTSD    | 6.996         | 0.030  | 0.585           | 19704.5       | 0.006  | 0.234           | 3.326         | 0.190 | 0.494           | 39522.5       | 0.152 | 0.312           |
| GP26        | Control | 1.097         | 0.578  | 0.751           | 19744.5       | 0.389  | 0.690           | 2.511         | 0.285 | 0.529           | 28838.0       | 0.438 | 0.633           |
|             | PTSD    | 2.785         | 0.248  | 0.645           | 22232.5       | 0.274  | 0.712           | 4.870         | 0.088 | 0.245           | 37846.5       | 0.024 | 0.072           |
| GP27        | Control | 1.000         | 0.606  | 0.762           | 20838.5       | 0.979  | 0.979           | 0.199         | 0.905 | 0.954           | 29402.0       | 0.676 | 0.799           |
|             | PTSD    | 0.535         | 0.765  | 0.962           | 23526.5       | 0.802  | 0.948           | 2.215         | 0.330 | 0.560           | 39884.5       | 0.209 | 0.354           |
| GP28        | Control | 3.167         | 0.205  | 0.571           | 18332.5       | 0.052  | 0.203           | 2.034         | 0.362 | 0.504           | 28456.0       | 0.308 | 0.501           |
|             | PTSD    | 3.438         | 0.179  | 0.698           | 20964.5       | 0.055  | 0.358           | 0.546         | 0.761 | 0.848           | 41616.5       | 0.682 | 0.700           |
| GP29        | Control | 3.986         | 0.136  | 0.530           | 18026.5       | 0.030  | 0.167           | 4.068         | 0.131 | 0.464           | 27664.0       | 0.128 | 0.333           |
|             | PTSD    | 7.226         | 0.027  | 1.000           | 19704.5       | 0.006  | 0.117           | 0.954         | 0.621 | 0.781           | 41356.5       | 0.591 | 0.659           |
| GP30        | Control | 5.343         | 0.069  | 0.336           | 17752.5       | 0.017  | 0.111           | 1.536         | 0.464 | 0.603           | 30018.0       | 0.980 | 0.980           |
|             | PTSD    | 0.782         | 0.676  | 0.942           | 22652.5       | 0.412  | 0.803           | 3.093         | 0.213 | 0.437           | 38896.5       | 0.082 | 0.228           |
| GP31        | Control | 3.945         | 0.139  | 0.493           | 18042.5       | 0.031  | 0.151           | 8.694         | 0.013 | 0.169           | 25588.0       | 0.004 | 0.052           |
|             | PTSD    | 2.337         | 0.311  | 0.674           | 22074.5       | 0.232  | 0.754           | 6.571         | 0.037 | 0.160           | 37016.5       | 0.008 | <b>0.045</b>    |
| GP32        | Control | 3.642         | 0.162  | 0.486           | 19726.5       | 0.381  | 0.708           | 3.927         | 0.140 | 0.455           | 27034.0       | 0.054 | 0.234           |
|             | PTSD    | 3.645         | 0.162  | 0.702           | 20904.5       | 0.050  | 0.390           | 5.311         | 0.070 | 0.228           | 37562.5       | 0.017 | 0.060           |
| GP33        | Control | 1.459         | 0.482  | 0.752           | 19818.5       | 0.420  | 0.712           | 0.348         | 0.840 | 0.910           | 29212.0       | 0.590 | 0.793           |
|             | PTSD    | 0.654         | 0.721  | 0.937           | 23588.5       | 0.834  | 0.879           | 1.660         | 0.436 | 0.654           | 40166.5       | 0.263 | 0.395           |
| GP34        | Control | 6.657         | 0.036  | 0.281           | 17340.5       | 0.007  | 0.068           | 2.569         | 0.277 | 0.540           | 27578.0       | 0.115 | 0.345           |
|             | PTSD    | 2.070         | 0.355  | 0.729           | 22688.5       | 0.426  | 0.791           | 1.320         | 0.517 | 0.720           | 40026.5       | 0.235 | 0.382           |
| GP35        | Control | 1.444         | 0.486  | 0.702           | 19230.5       | 0.210  | 0.455           | 2.669         | 0.263 | 0.570           | 27672.0       | 0.129 | 0.314           |
|             | PTSD    | 0.495         | 0.781  | 0.952           | 22836.5       | 0.484  | 0.787           | 1.244         | 0.537 | 0.698           | 40096.5       | 0.249 | 0.388           |
| GP36        | Control | 15.133        | 0.001  | <b>0.020</b>    | 16010.5       | <0.001 | <b>0.003</b>    | 4.583         | 0.101 | 0.563           | 26752.0       | 0.035 | 0.341           |
|             | PTSD    | 0.686         | 0.710  | 0.955           | 23168.5       | 0.629  | 0.876           | 7.540         | 0.023 | 0.150           | 37424.5       | 0.014 | 0.061           |
| GP37        | Control | 15.139        | 0.001  | <b>0.013</b>    | 15514.5       | <0.001 | <b>0.001</b>    | 0.096         | 0.953 | 0.978           | 29586.0       | 0.764 | 0.876           |
|             | PTSD    | 3.877         | 0.144  | 0.936           | 21044.5       | 0.062  | 0.345           | 1.705         | 0.426 | 0.665           | 40344.5       | 0.302 | 0.436           |
| GP38        | Control | 17.400        | <0.001 | <b>0.007</b>    | 15342.5       | <0.001 | <b>0.001</b>    | 0.853         | 0.653 | 0.728           | 28706.0       | 0.390 | 0.585           |
|             | PTSD    | 1.702         | 0.427  | 0.757           | 22152.5       | 0.252  | 0.756           | 3.287         | 0.193 | 0.443           | 39568.5       | 0.158 | 0.293           |
| GP39        | Control | 5.976         | 0.050  | 0.325           | 17626.5       | 0.013  | 0.101           | 2.196         | 0.334 | 0.501           | 27760.0       | 0.144 | 0.330           |
|             | PTSD    | 0.004         | 0.998  | 0.998           | 23874.5       | 0.981  | 0.981           | 0.931         | 0.628 | 0.765           | 41018.5       | 0.483 | 0.608           |

The data are represented as the Kruskal-Wallis H value or the Mann-Whitney U value, the original p-value, and the p-value corrected with the Benjamini-Hochberg procedure (p<sub>BH</sub>). Significant p<sub>BH</sub> are denoted in bold.

**Supplementary Table S4.** The associations of the rs10483776 and rs4073416 polymorphisms (genetic and allelic model) with the plasma N-glycan levels in the control participants and the patients with PTSD.

| Glycan peak | Group   | rs10483776    |        |                  |               |        |                  | rs4073416     |       |              |               |        |              |
|-------------|---------|---------------|--------|------------------|---------------|--------|------------------|---------------|-------|--------------|---------------|--------|--------------|
|             |         | Genetic model |        |                  | Allelic model |        |                  | Genetic model |       |              | Allelic model |        |              |
|             |         | H             | p      | pBH              | U             | p      | pBH              | H             | p     | pBH          | U             | p      | pBH          |
| GP01        | Control | 2.266         | 0.322  | 0.571            | 17806.5       | 0.282  | 0.611            | 1.984         | 0.371 | 0.629        | 27528.0       | 0.215  | 0.399        |
|             | PTSD    | 0.476         | 0.788  | 0.878            | 27984.5       | 0.524  | 0.705            | 0.419         | 0.811 | 0.904        | 41838.5       | 0.874  | 0.921        |
| GP02        | Control | 0.170         | 0.918  | 0.968            | 18746.5       | 0.743  | 0.828            | 3.781         | 0.151 | 0.535        | 27896.0       | 0.315  | 0.473        |
|             | PTSD    | 2.669         | 0.263  | 0.466            | 26576.5       | 0.142  | 0.346            | 2.443         | 0.295 | 0.677        | 39138.5       | 0.138  | 0.449        |
| GP03        | Control | 0.081         | 0.960  | 0.985            | 18794.5       | 0.772  | 0.814            | 5.141         | 0.076 | 0.329        | 27312.0       | 0.168  | 0.385        |
|             | PTSD    | 1.991         | 0.370  | 0.601            | 27324.5       | 0.304  | 0.515            | 2.189         | 0.335 | 0.622        | 39536.5       | 0.198  | 0.429        |
| GP04        | Control | 2.321         | 0.313  | 0.610            | 17266.5       | 0.132  | 0.322            | 5.919         | 0.052 | 0.338        | 25580.0       | 0.013  | 0.101        |
|             | PTSD    | 1.064         | 0.588  | 0.791            | 28396.5       | 0.694  | 0.820            | 1.655         | 0.437 | 0.710        | 41536.5       | 0.759  | 0.987        |
| GP05        | Control | 1.789         | 0.409  | 0.638            | 17826.5       | 0.289  | 0.593            | 2.498         | 0.287 | 0.533        | 27430.0       | 0.192  | 0.394        |
|             | PTSD    | 0.310         | 0.856  | 0.927            | 28698.5       | 0.830  | 0.925            | 0.107         | 0.948 | 0.948        | 41694.5       | 0.819  | 0.913        |
| GP06        | Control | 2.488         | 0.288  | 0.591            | 18024.5       | 0.366  | 0.595            | 1.500         | 0.472 | 0.736        | 27584.0       | 0.228  | 0.387        |
|             | PTSD    | 5.048         | 0.080  | 0.240            | 25536.5       | 0.037  | 0.289            | 6.773         | 0.034 | 0.265        | 37214.5       | 0.015  | 0.293        |
| GP07        | Control | 2.757         | 0.252  | 0.578            | 17122.5       | 0.105  | 0.315            | 5.384         | 0.068 | 0.332        | 25762.0       | 0.018  | 0.117        |
|             | PTSD    | 4.801         | 0.091  | 0.237            | 26324.5       | 0.106  | 0.295            | 0.794         | 0.672 | 0.904        | 41200.5       | 0.638  | 0.889        |
| GP08        | Control | 2.954         | 0.228  | 0.593            | 17330.5       | 0.145  | 0.333            | 10.262        | 0.006 | 0.117        | 24352.0       | 0.001  | <b>0.020</b> |
|             | PTSD    | 0.501         | 0.779  | 0.894            | 27942.5       | 0.508  | 0.708            | 3.541         | 0.170 | 0.663        | 42126.5       | 0.987  | 0.987        |
| GP09        | Control | 0.652         | 0.722  | 0.828            | 18380.5       | 0.536  | 0.697            | 3.391         | 0.183 | 0.446        | 27246.0       | 0.155  | 0.378        |
|             | PTSD    | 5.688         | 0.058  | 0.189            | 25820.5       | 0.055  | 0.306            | 3.098         | 0.212 | 0.591        | 38972.5       | 0.118  | 0.418        |
| GP10        | Control | 3.104         | 0.212  | 0.591            | 17948.5       | 0.335  | 0.653            | 3.314         | 0.191 | 0.438        | 26902.0       | 0.100  | 0.325        |
|             | PTSD    | 1.822         | 0.402  | 0.627            | 27732.5       | 0.432  | 0.648            | 1.472         | 0.479 | 0.719        | 39958.5       | 0.280  | 0.475        |
| GP11        | Control | 0.948         | 0.623  | 0.784            | 18276.5       | 0.483  | 0.650            | 0.445         | 0.801 | 0.893        | 28572.0       | 0.569  | 0.672        |
|             | PTSD    | 9.244         | 0.010  | 0.078            | 25878.5       | 0.060  | 0.234            | 3.376         | 0.185 | 0.555        | 38664.5       | 0.086  | 0.335        |
| GP12        | Control | 0.271         | 0.873  | 0.946            | 18492.5       | 0.596  | 0.726            | 5.452         | 0.065 | 0.362        | 26056.0       | 0.029  | 0.141        |
|             | PTSD    | 0.922         | 0.631  | 0.794            | 28232.5       | 0.624  | 0.785            | 0.357         | 0.836 | 0.906        | 41310.5       | 0.677  | 0.910        |
| GP13        | Control | 2.316         | 0.314  | 0.583            | 17230.5       | 0.125  | 0.325            | 7.641         | 0.022 | 0.215        | 27376.0       | 0.181  | 0.392        |
|             | PTSD    | 2.709         | 0.258  | 0.479            | 27046.5       | 0.233  | 0.478            | 2.401         | 0.301 | 0.652        | 39160.5       | 0.141  | 0.423        |
| GP14        | Control | 5.245         | 0.073  | 0.475            | 16446.5       | 0.031  | 0.202            | 9.849         | 0.007 | 0.091        | 24472.0       | 0.001  | <b>0.013</b> |
|             | PTSD    | 4.174         | 0.124  | 0.269            | 25758.5       | 0.051  | 0.332            | 3.677         | 0.159 | 0.689        | 39444.5       | 0.183  | 0.446        |
| GP15        | Control | 0.966         | 0.617  | 0.802            | 18434.5       | 0.564  | 0.710            | 1.728         | 0.421 | 0.684        | 27560.0       | 0.222  | 0.394        |
|             | PTSD    | 6.675         | 0.036  | 0.156            | 27052.5       | 0.235  | 0.458            | 4.197         | 0.123 | 0.685        | 38234.5       | 0.054  | 0.301        |
| GP16        | Control | 1.831         | 0.400  | 0.650            | 18098.5       | 0.399  | 0.599            | 3.689         | 0.158 | 0.474        | 27496.0       | 0.207  | 0.404        |
|             | PTSD    | 15.503        | <0.001 | <b>0.017</b>     | 24838.5       | 0.013  | 0.169            | 6.853         | 0.033 | 0.322        | 37340.5       | 0.018  | 0.176        |
| GP17        | Control | 2.928         | 0.231  | 0.563            | 16988.5       | 0.084  | 0.298            | 3.308         | 0.191 | 0.414        | 26590.0       | 0.065  | 0.282        |
|             | PTSD    | 9.725         | 0.008  | 0.078            | 26748.5       | 0.171  | 0.392            | 3.425         | 0.180 | 0.585        | 38640.5       | 0.084  | 0.364        |
| GP18        | Control | 1.349         | 0.51   | 0.710            | 17966.5       | 0.342  | 0.635            | 3.692         | 0.158 | 0.440        | 28566.0       | 0.566  | 0.690        |
|             | PTSD    | 1.279         | 0.527  | 0.734            | 28146.5       | 0.588  | 0.764            | 0.139         | 0.933 | 0.983        | 41676.5       | 0.812  | 0.931        |
| GP19        | Control | 2.001         | 0.368  | 0.624            | 18748.5       | 0.744  | 0.806            | 3.720         | 0.156 | 0.507        | 27010.0       | 0.116  | 0.323        |
|             | PTSD    | 0.168         | 0.92   | 0.970            | 28564.5       | 0.768  | 0.881            | 0.695         | 0.706 | 0.860        | 41592.5       | 0.780  | 0.951        |
| GP20        | Control | 3.673         | 0.159  | 0.517            | 16706.5       | 0.051  | 0.249            | 3.679         | 0.159 | 0.413        | 26926.0       | 0.104  | 0.312        |
|             | PTSD    | 6.194         | 0.045  | 0.160            | 26016.5       | 0.072  | 0.255            | 3.916         | 0.141 | 0.687        | 38474.5       | 0.070  | 0.341        |
| GP21        | Control | 2.755         | 0.252  | 0.546            | 18164.5       | 0.429  | 0.620            | 0.452         | 0.798 | 0.915        | 28716.0       | 0.633  | 0.726        |
|             | PTSD    | 1.517         | 0.468  | 0.702            | 27356.5       | 0.313  | 0.509            | 0.492         | 0.782 | 0.897        | 42036.5       | 0.951  | 0.976        |
| GP22        | Control | 22.050        | <0.001 | <b>&lt;0.001</b> | 13506.5       | <0.001 | <b>&lt;0.001</b> | 14.606        | 0.001 | <b>0.039</b> | 23952.0       | <0.001 | <b>0.016</b> |
|             | PTSD    | 12.924        | 0.002  | <b>0.026</b>     | 23454.5       | 0.001  | <b>0.039</b>     | 11.303        | 0.004 | 0.156        | 36856.5       | 0.009  | 0.351        |
| GP23        | Control | 0.522         | 0.770  | 0.858            | 18936.5       | 0.860  | 0.883            | 1.022         | 0.600 | 0.807        | 28022.0       | 0.356  | 0.514        |
|             | PTSD    | 9.194         | 0.010  | 0.065            | 26536.5       | 0.135  | 0.351            | 7.693         | 0.021 | 0.273        | 37268.5       | 0.016  | 0.208        |
| GP24        | Control | 1.147         | 0.563  | 0.757            | 18058.5       | 0.381  | 0.594            | 1.105         | 0.576 | 0.802        | 27886.0       | 0.312  | 0.487        |
|             | PTSD    | 0.031         | 0.985  | 0.985            | 28978.5       | 0.96   | 0.960            | 1.483         | 0.476 | 0.743        | 39806.5       | 0.248  | 0.484        |
| GP25        | Control | 0.708         | 0.702  | 0.830            | 18654.5       | 0.688  | 0.789            | 0.934         | 0.627 | 0.815        | 28162.0       | 0.405  | 0.564        |

| Glycan peak | Group   | rs10483776    |        |                  |               |        |                  | rs4073416     |       |       |               |       |       |
|-------------|---------|---------------|--------|------------------|---------------|--------|------------------|---------------|-------|-------|---------------|-------|-------|
|             |         | Genetic model |        |                  | Allelic model |        |                  | Genetic model |       |       | Allelic model |       |       |
|             |         | H             | p      | pBH              | U             | p      | pBH              | H             | p     | pBH   | U             | p     | pBH   |
|             | PTSD    | 2.275         | 0.321  | 0.544            | 26940.5       | 0.21   | 0.455            | 0.741         | 0.690 | 0.868 | 40494.5       | 0.414 | 0.621 |
| GP26        | Control | 0.006         | 0.997  | 0.997            | 19126.5       | 0.98   | 0.980            | 2.918         | 0.233 | 0.454 | 26736.0       | 0.080 | 0.312 |
|             | PTSD    | 1.408         | 0.495  | 0.715            | 27608.5       | 0.39   | 0.608            | 2.381         | 0.304 | 0.624 | 39878.5       | 0.263 | 0.488 |
| GP27        | Control | 5.551         | 0.062  | 0.484            | 17038.5       | 0.091  | 0.296            | 0.822         | 0.663 | 0.834 | 28166.0       | 0.406 | 0.546 |
|             | PTSD    | 6.987         | 0.03   | 0.146            | 25466.5       | 0.034  | 0.332            | 3.531         | 0.171 | 0.606 | 39252.5       | 0.154 | 0.429 |
| GP28        | Control | 4.464         | 0.107  | 0.464            | 16458.5       | 0.031  | 0.173            | 0.257         | 0.879 | 0.927 | 29426.0       | 0.984 | 0.984 |
|             | PTSD    | 0.663         | 0.718  | 0.875            | 27750.5       | 0.438  | 0.633            | 1.235         | 0.539 | 0.751 | 41572.5       | 0.773 | 0.972 |
| GP29        | Control | 12.852        | 0.002  | <b>0.020</b>     | 14608.5       | <0.001 | <b>0.003</b>     | 6.997         | 0.030 | 0.234 | 25248.0       | 0.007 | 0.068 |
|             | PTSD    | 1.056         | 0.59   | 0.767            | 28820.5       | 0.886  | 0.909            | 0.597         | 0.742 | 0.877 | 41592.5       | 0.780 | 0.922 |
| GP30        | Control | 0.830         | 0.660  | 0.804            | 18018.5       | 0.364  | 0.617            | 2.410         | 0.300 | 0.532 | 27146.0       | 0.137 | 0.356 |
|             | PTSD    | 0.051         | 0.975  | 1.001            | 28774.5       | 0.865  | 0.937            | 1.468         | 0.480 | 0.693 | 40226.5       | 0.343 | 0.535 |
| GP31        | Control | 24.363        | <0.001 | <b>&lt;0.001</b> | 13052.5       | <0.001 | <b>&lt;0.001</b> | 1.293         | 0.524 | 0.757 | 27646.0       | 0.244 | 0.397 |
|             | PTSD    | 13.755        | 0.001  | <b>0.020</b>     | 23276.5       | 0.001  | <b>0.020</b>     | 7.989         | 0.018 | 0.351 | 37588.5       | 0.025 | 0.195 |
| GP32        | Control | 4.618         | 0.099  | 0.483            | 16420.5       | 0.029  | 0.226            | 4.824         | 0.090 | 0.351 | 25960.0       | 0.025 | 0.139 |
|             | PTSD    | 3.972         | 0.137  | 0.281            | 26062.5       | 0.076  | 0.247            | 2.194         | 0.334 | 0.651 | 39292.5       | 0.159 | 0.413 |
| GP33        | Control | 4.868         | 0.088  | 0.490            | 17152.5       | 0.110  | 0.306            | 0.723         | 0.697 | 0.849 | 28394.0       | 0.494 | 0.621 |
|             | PTSD    | 6.466         | 0.039  | 0.152            | 25860.5       | 0.058  | 0.251            | 2.898         | 0.235 | 0.611 | 39444.5       | 0.183 | 0.420 |
| GP34        | Control | 13.535        | 0.001  | <b>0.013</b>     | 14452.5       | <0.001 | <b>0.002</b>     | 1.376         | 0.503 | 0.755 | 28230.0       | 0.430 | 0.559 |
|             | PTSD    | 4.603         | 0.100  | 0.229            | 26212.5       | 0.092  | 0.276            | 2.775         | 0.250 | 0.609 | 39938.5       | 0.276 | 0.489 |
| GP35        | Control | 3.882         | 0.144  | 0.511            | 16942.5       | 0.077  | 0.300            | 3.114         | 0.211 | 0.433 | 26730.0       | 0.080 | 0.284 |
|             | PTSD    | 3.324         | 0.19   | 0.371            | 28774.5       | 0.865  | 0.912            | 0.119         | 0.942 | 0.967 | 41776.5       | 0.851 | 0.922 |
| GP36        | Control | 1.444         | 0.486  | 0.702            | 18606.5       | 0.661  | 0.781            | 0.414         | 0.813 | 0.881 | 28718.0       | 0.634 | 0.706 |
|             | PTSD    | 8.367         | 0.015  | 0.084            | 25824.5       | 0.056  | 0.273            | 4.843         | 0.089 | 0.579 | 37934.5       | 0.038 | 0.247 |
| GP37        | Control | 3.496         | 0.174  | 0.522            | 16828.5       | 0.063  | 0.273            | 0.185         | 0.912 | 0.912 | 28868.0       | 0.705 | 0.743 |
|             | PTSD    | 0.568         | 0.753  | 0.890            | 28290.5       | 0.648  | 0.790            | 0.752         | 0.687 | 0.893 | 41074.5       | 0.594 | 0.858 |
| GP38        | Control | 1.622         | 0.444  | 0.666            | 17988.5       | 0.351  | 0.622            | 0.231         | 0.891 | 0.914 | 29370.0       | 0.955 | 0.980 |
|             | PTSD    | 4.700         | 0.095  | 0.232            | 27190.5       | 0.269  | 0.500            | 1.897         | 0.387 | 0.656 | 39558.5       | 0.202 | 0.415 |
| GP39        | Control | 4.202         | 0.122  | 0.476            | 18268.5       | 0.479  | 0.667            | 0.511         | 0.775 | 0.916 | 28724.0       | 0.637 | 0.690 |
|             | PTSD    | 5.061         | 0.08   | 0.223            | 27216.5       | 0.275  | 0.488            | 2.064         | 0.356 | 0.631 | 40196.5       | 0.335 | 0.544 |

The data are represented as the Kruskal-Wallis H value or the Mann-Whitney U value, the original p-value, and the p-value corrected with the Benjamini-Hochberg procedure (p<sub>BH</sub>). Significant p<sub>BH</sub> are denoted in bold.

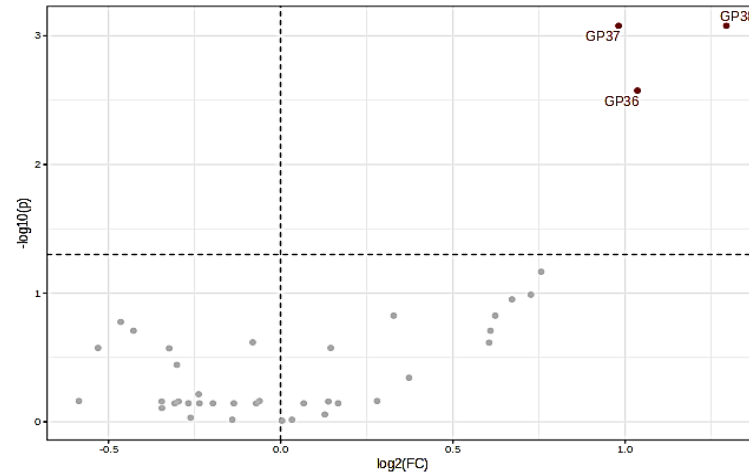

(a)

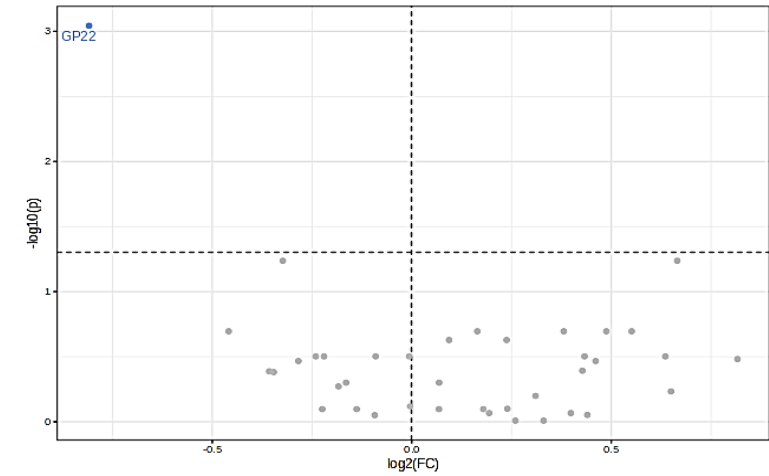

(b)

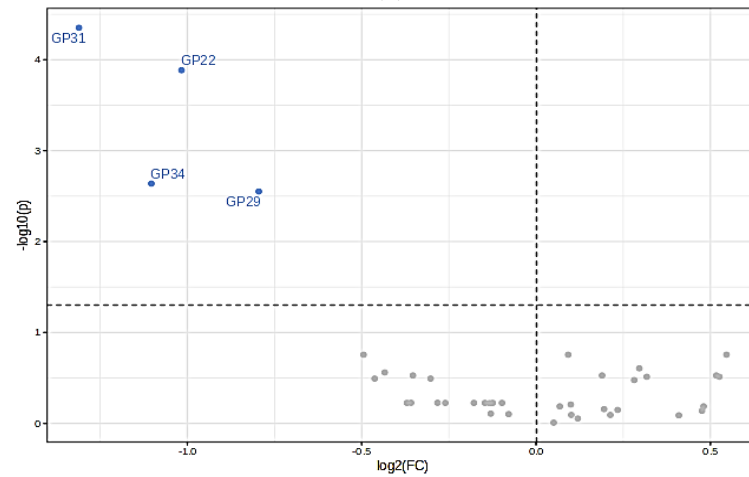

(c)

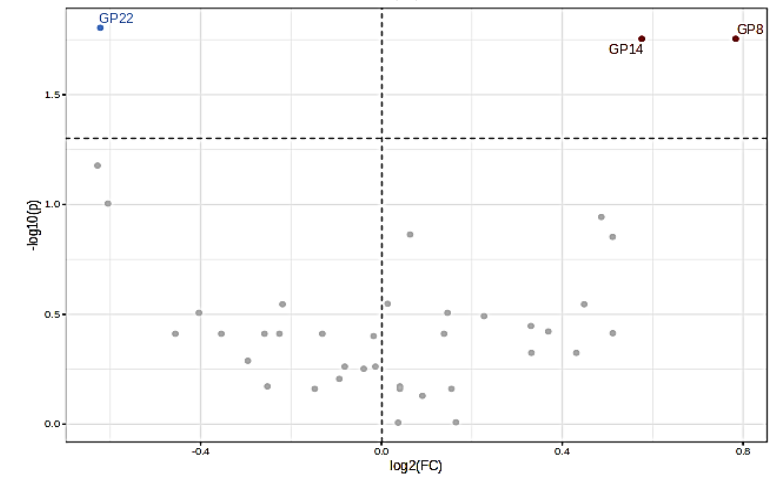

(d)

**Supplementary Figure S1.** Direction and size of glycan concentration change in the minor allele carriers compared to carriers of the major allele of (a) rs6573604, (b) rs11621121, (c) rs10483776, and (d) rs4073416 polymorphism in control participants. Significantly increased or decreased glycan peaks are labeled with red or blue circles, respectively, while non-significant glycan peaks are represented with grey circles.  $\log_2(\text{FC})$  = logarithm of fold change;  $-\log_{10}(p)$  = negative logarithm of FDR corrected p-value (Benjamini-Hochberg method).

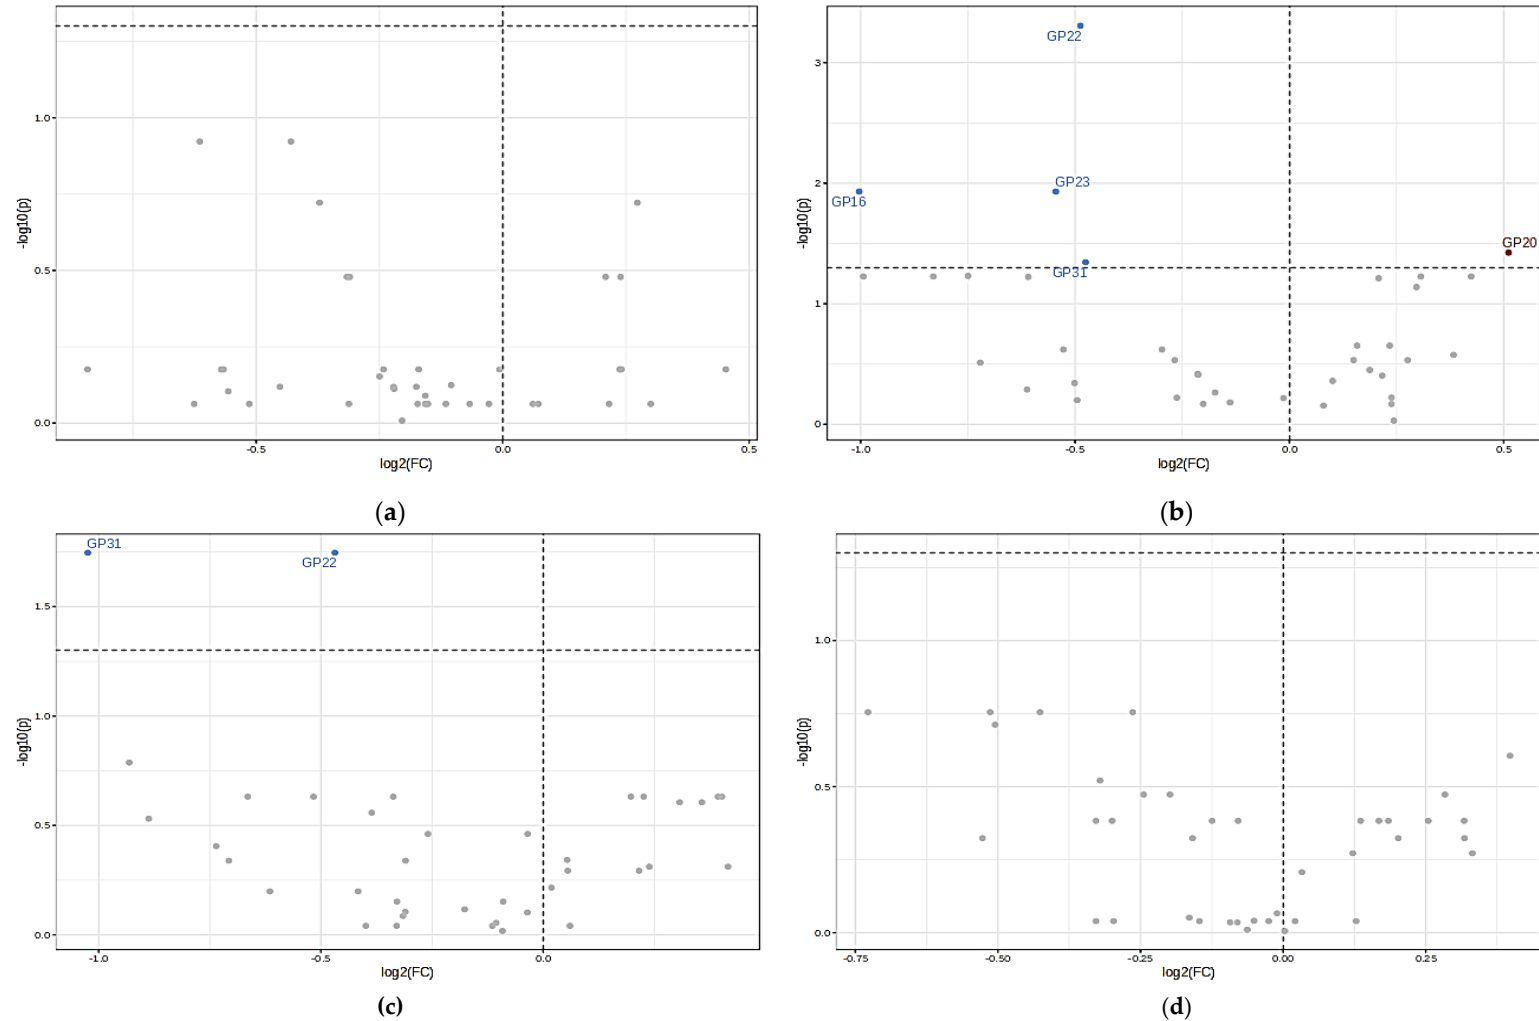

**Supplementary Figure S2.** Direction and size of glycan concentration change in the minor allele carriers compared to carriers of the major allele of (a) rs6573604, (b) rs11621121, (c) rs10483776, and (d) rs4073416 polymorphism in PTSD patients. Significantly increased or decreased glycan peaks are labeled with red or blue circles, respectively, while non-significant glycan peaks are represented with grey circles.  $\log_2(\text{FC})$  = logarithm of fold change;  $-\log_{10}(p)$  = negative logarithm of FDR corrected p-value (Benjamini-Hochberg method).



**Supplementary Table S5.** The associations of the rs11621121-rs10483776 haplotypes with the plasma N-glycan levels in the control participants and the patients with PTSD.

| Glycan<br>peak | Control participants |        |                  | Patients with PTSD |        |                 |
|----------------|----------------------|--------|------------------|--------------------|--------|-----------------|
|                | H                    | p      | p <sub>BH</sub>  | H                  | p      | p <sub>BH</sub> |
| GP01           | 1.300                | 0.522  | 0.617            | 1.670              | 0.434  | 0.605           |
| GP02           | 1.534                | 0.465  | 0.585            | 3.069              | 0.216  | 0.401           |
| GP03           | 4.912                | 0.086  | 0.280            | 1.565              | 0.457  | 0.594           |
| GP04           | 4.479                | 0.107  | 0.261            | 2.249              | 0.325  | 0.507           |
| GP05           | 1.471                | 0.479  | 0.584            | 0.866              | 0.649  | 0.723           |
| GP06           | 1.534                | 0.464  | 0.603            | 7.470              | 0.024  | 0.134           |
| GP07           | 3.306                | 0.191  | 0.372            | 2.752              | 0.253  | 0.429           |
| GP08           | 8.654                | 0.013  | 0.101            | 4.056              | 0.132  | 0.343           |
| GP09           | 2.180                | 0.336  | 0.570            | 3.806              | 0.149  | 0.363           |
| GP10           | 2.049                | 0.359  | 0.560            | 1.070              | 0.586  | 0.672           |
| GP11           | 0.516                | 0.773  | 0.815            | 6.447              | 0.040  | 0.173           |
| GP12           | 0.243                | 0.886  | 0.909            | 0.396              | 0.820  | 0.842           |
| GP13           | 2.054                | 0.358  | 0.582            | 6.453              | 0.040  | 0.156           |
| GP14           | 5.840                | 0.054  | 0.351            | 8.159              | 0.017  | 0.111           |
| GP15           | 5.010                | 0.082  | 0.291            | 3.017              | 0.221  | 0.392           |
| GP16           | 1.569                | 0.456  | 0.635            | 11.877             | 0.003  | <b>0.029</b>    |
| GP17           | 4.907                | 0.086  | 0.258            | 6.927              | 0.031  | 0.151           |
| GP18           | 0.843                | 0.656  | 0.731            | 1.626              | 0.444  | 0.597           |
| GP19           | 5.335                | 0.069  | 0.384            | 0.402              | 0.818  | 0.862           |
| GP20           | 4.752                | 0.093  | 0.242            | 8.528              | 0.014  | 0.109           |
| GP21           | 3.546                | 0.170  | 0.368            | 0.806              | 0.668  | 0.724           |
| GP22           | 25.182               | <0.001 | <b>&lt;0.001</b> | 20.069             | <0.001 | <b>0.002</b>    |
| GP23           | 0.049                | 0.976  | 0.976            | 12.508             | 0.002  | <b>0.026</b>    |
| GP24           | 1.700                | 0.427  | 0.617            | 3.640              | 0.162  | 0.372           |
| GP25           | 0.652                | 0.722  | 0.782            | 2.328              | 0.312  | 0.507           |
| GP26           | 1.250                | 0.535  | 0.614            | 5.245              | 0.073  | 0.219           |
| GP27           | 3.379                | 0.185  | 0.380            | 4.342              | 0.114  | 0.318           |
| GP28           | 5.022                | 0.081  | 0.351            | 1.774              | 0.412  | 0.595           |
| GP29           | 12.000               | 0.002  | <b>0.020</b>     | 0.307              | 0.858  | 0.858           |
| GP30           | 1.549                | 0.461  | 0.620            | 3.584              | 0.167  | 0.343           |
| GP31           | 24.234               | <0.001 | <b>&lt;0.001</b> | 13.471             | 0.001  | <b>0.020</b>    |
| GP32           | 5.325                | 0.070  | 0.341            | 5.924              | 0.052  | 0.169           |
| GP33           | 2.807                | 0.246  | 0.436            | 3.605              | 0.165  | 0.358           |
| GP34           | 14.390               | 0.001  | <b>0.013</b>     | 3.149              | 0.207  | 0.404           |
| GP35           | 3.618                | 0.164  | 0.376            | 1.355              | 0.508  | 0.639           |
| GP36           | 4.764                | 0.092  | 0.256            | 6.432              | 0.040  | 0.142           |
| GP37           | 5.020                | 0.081  | 0.316            | 1.124              | 0.570  | 0.674           |
| GP38           | 2.883                | 0.237  | 0.440            | 2.120              | 0.346  | 0.519           |
| GP39           | 2.050                | 0.359  | 0.539            | 1.276              | 0.528  | 0.644           |

The data are represented as the Kruskal-Wallis H value, the original p-value, and the p-value corrected with the Benjamini-Hochberg procedure (p<sub>BH</sub>). Significant p<sub>BH</sub> values are denoted in bold.
